# Supplementary material for: Anti-fibrotic activity of a rho-kinase inhibitor restores outflow function and intraocular pressure homeostasis
Source: eLife. 2021 Mar 30;10:e60831. doi: 10.7554/eLife.60831 (PMC8009676; doi:10.7554/eLife.60831)
Supplement: Figure 2—source data 1. [file elife-60831-fig2-data1.xlsx]

## Sheet: 2B
	NT										PL
0	19.5	20	19.8333	19.8333	19.75	18.8333	18.3333	19.3333			20	19.3333	20	21.5	19.4286	20	18.8333	17.6667
	14.1667	17.5714	15.6	15.6	16.7143	15.3333	14.6667	17.3333	18.1667		20.1667	21	20.5	21.3333	19.2857	18.6667	19.8333	19.8333
					16.6667	15.836	17.8333	16	20.3333						22.8333	22	20.3333	16.5
	15.1667	21.4286	20.5	23.1667							24.6667	23.3333	21.3333	24
5	15	19.5	19.8333	20.5							26.8333	24	24.2857	23.8333
	20.6667	20.6667	22.7143	19.8333	19.1667	21	19	18.6667	19.5		23.6667	25	24.8571	26.3333	23.3333	26	25	24
10	14.2	13.6		14	19		20.5	22.8333	21.6667		23	23.25	25	24.625	24.2	27.6667	26.3333	27.1667
	19.25	18.6667	20	20.3333	20.3333	22.2857	19.3633	19.1667	21.1667		23.6667	16	21.5	23.5	24.5	25.25	29.1667	28.3333
	17.5	18.3333	18.1667	21.5	19.4286	20.5	22.4	18.2857	20		24.3333	24.5	29.1667	25.8333	24	27.5	27.5	26.5
15	17.6667	18.3333	19.4286	21	18	19	18	19.5	20		26.3333	25	23.1667	24.1667	23.6667	27.6667	24	26.3333
	16.5	18	21	22	19.5	20.6667	18.5	19.5	18		27.1667	26.6667	26.4286	26.5	23.5	25	25.6667	27
	18.6667	23.3333	20.5	22.5	20.5	19.6667	19.3333	20.1429	21.8333		27.2	28.5	22.3333	25.6667	25.8333	29	27.1667	27.3333
20	17.1667	19	19.6667	22.3333							26.1667	26.6667	28	25.4
	19.8333	20.1667	20.3333	19.3333							21.8	29.5	27.5	29.5714
	18.6667	19.3333	18.6667	19.5714	20.1667	22.3333	20.1667	20.5	21.5		29.6667		28.1667	27.3333	25.1667	30.5	28	26
25
	16.4286	20.8333	19.1667	21.5	16.4	20.2	11.75	18.2	18		26.6667		24.6667	28	23.5	25	25.25	26.5
28	19	16.5	16.3333	18	17	19	18.5714	16.6667	20.1667		22.8333		26	24.8	22	20	26.3333	27.1667

## Sheet: 2F
	PL									NT
Before DEX-NP	0.166667	1.66667	0.5	-0.16667	-0.14286	-1.33333	1	2.16667		-5.33333	-2.42857	-4.23333	-4.23333	-3.03571	-3.5	-3.66667	-2
During DEX-NP	5.28571	5.43182	5.17177	4.18308	4.54143	6.35833	7.60833	8.96364		-2.19915	0.287755	1.38278	1.06463	-0.80048	1.6836	0.425143	0.012857

## Sheet: 2C
	outflow facility
	PL_CON	PL	NT_CON	NT
	2	3.1	3.8	2
		1.1	3.6	4
	2.6	3.7	6.2	3.6
	2.1	1.9	3	12.1
	2	3.8	4.6	2.4
			5	2.6
	1.9	1.6	7.2	8.1
	1.9	3.3	2.2	4.7
			3.9	4.3

## Sheet: 2D
days	PL													NT
0	20.5	20	19.1667	18.3333	18.1667	19.3333	20.3333	19.5	18.1667	18.6667	21			16.3333	17.3333	15.1667	21.6667	19.3333	18.3333	20.1667	14.5	19	20.5	19.6667	18.1667	19.1667
3	14	26	26.6667	28.5	18.3333	24.8	22.8333	24.3333	22.8333	19.8333	25.8333			14.5	21	24.8333	18.8333	15.3333	20.5	20.5	28.3333	26		22.6667	21.3333	21.5
5
7	27.8333	28.3333	32.3333	28.5	25.5	22	25.1667	26.6667	28.5	26	28.5			30.3333	26.3333	29.5	30.8333	15.6667	22.8333	22.3333	26	24.5714	26.3333	26.6667	25.1667	25.8333
10	26	21	23	30.6667	26.3333	17.5	26.5	26.6	30.8333	29.5	31.1667			23	25.6667	30		26.6667	22.5	28.1667	29	25	29.8333	31.1667	29.1667	28.1667
14	27	20	26.8333	29.6667	25	18.5	26.3333		24.6667	31	28.5			25	21.5	23.6667	26.5	27	26	27.6	27.5	26.5	24.6667	28.5	28.1667	27
15
17	23.8333	24	30.6667	25.1667	26	27.8333	28.1667	28.6667	28.5	26.5	26.5			23.8333	25.1667	26.6667	29	26.5	26.5	24			29.1667	29.6667	29	24
20
21	23.8333	25	28.1667		20.6667	26.1667	25.3333	30.5	28.3333	26.8333	29.8333			23.8333	27.5	29.8333	31.6667	27.5	27.1667	29.6667	28.6667	25.5	30.6667	28.5	27.6667	27.6667
22	24.1667	29.1667	29.8333	28.5	27.8333		26.8333	28.5	29.1667	23.1667	30.1667			21.1667	22.5	22.6667	22.8333	25.6667	22	19.5714	22.6667	21.8333	20	21.5	24	21
23	23.5	28.5	21	29.6667	27.1667		28.1		25.75	24.8333	27.3333			23.3333	23.1667	22.3333	29.5	23.1667	20.1667	19.6667	20.75	20.3333	21.3333	21	20.3333	21.6667
24	28	27.1667	22.3333	31.6667	23.8		28.6		25.6667	26.8333	30.6667			20.5	20.5	22.3333	20.3333	24.6667	18.8	19	18.6667	23	18.5	20.5	19.6667	23.1667
25	24.5	28.1667	33.3333	28.8333	30.6667		26.6667							18.3333	24	21.3333	23.1667	23.2857	19	19.1667		21			19.6667	23.1667

## Sheet: 2G
PL eye
3 to 21	3.28	4.43	8.87	10.17	4.28	5.14	5.12	8.05	9.53	8.03	7.97			9.16	5.04	9.96	9.75	2.16	4.09
22-25	4.54167	8.25	7.45833	10.6667	9.2		7.21667	9.72222	8.69444	6.27777	8.38889			8.83333	7.075	12.75	8.14583	8.25	6.91667
NT eye
3 to 21	7.25	8.38	11.44	7.31	5.53	7.67	7.81	11.5	6.51	7.54	8.45	8.95	7.32	5.93	6.84	6.04	8.3	8.18	6.11
22-25	4.5	5.20834	7	2.29166	4.8631	2.05556	-0.698413		2.54167	-0.555557	1.33333	2.75	3.08333	0.769048	3.25	0.158333	3.41667	2.79167	3.625

## Sheet: 2H
	PL		NT
	pl_con	pl eye	nt_con	nt eye
	2.1	1.6	2.8	1.3
	1.8	3.7	3.3	4.7
	3.8	5.6	5.9	4.5
	4		3.4	6.6
	1.6	3.7	3.6	4.5
	4.6	5.5	6.2	6.7
			1.3	6.7
		3.5	1.1	5.8
	3.4	3.5	3.2	3.7
	1.6	3.2	3.3	8.2
	2	1	1.9	4.3
