# Supplementary material for: Anti-fibrotic activity of a rho-kinase inhibitor restores outflow function and intraocular pressure homeostasis
Source: eLife. 2021 Mar 30;10:e60831. doi: 10.7554/eLife.60831 (PMC8009676; doi:10.7554/eLife.60831)
Supplement: Figure 3—source data 1. [file elife-60831-fig3-data1.xlsx]

## Sheet: Fig 3A-F
oct area							Individual mice
4.18.18							PL eyes									NT eyes
	iop10_29	iop12_32	iop15_35	iop17_38	iop20_41		4.20.18	iop10_83	iop12_86	iop15_89	iop17_92	iop20_95				4.18.18
area	1043	575	269	195	101		area	1749	1601	1429	1007	777					iop10_29	iop12_32	iop15_35	iop17_38	iop20_41
	1	0.551294	0.25791	0.186961	0.096836		#2os	1	0.91538	0.817038	0.575758	0.444254				area	1043	575	269	195	101
																	1	0.551294	0.25791	0.186961	0.096836
							4.25.18	iop10_218	iop12_221	iop15_224	iop17_227	iop20_230
4.20.18	iop10_110	iop12_113	iop15_116	iop17_119	iop20_122		area	1315	1229	943	802	629				4.20.18	iop10_110	iop12_113	iop15_116	iop17_119	iop20_122
area	1627	1289	1032	526	145		#1	1	0.934601	0.71711	0.609886	0.478327				area	1627	1289	1032	526	145
os#3	1	0.792256	0.634296	0.323294	0.0891211											os#3	1	0.792256	0.634296	0.323294	0.0891211
							6.21.18	iop10_461	iop12_464	iop15_467	iop17_470	iop20_473
4.20.18	iop10_83	iop12_86	iop15_89	iop17_92	iop20_95		area	1591	1506	1322	1049	779				4.26.18	iop10_332	iop12_335	iop15_338	iop17_341	iop20_344
area	1749	1601	1429	1007	777		#2os	1	0.946574	0.830924	0.659334	0.489629				area	777	678	520	256	135
#2os	1	0.91538	0.817038	0.575758	0.444254											#2os	1	0.872587	0.669241	0.329472	0.173745
							8.2.18	iop10_896	iop12_899	iop15_902	iop17_905	iop20_908
4.25.18	iop10_218	iop12_221	iop15_224	iop17_227	iop20_230		area	1898	1722	1588	1138	683				6.21.18	iop10_569	iop12_572	iop15_575	iop17_578	iop20_581
area	1315	1229	943	802	629			1	0.907271	0.83667	0.599579	0.359852				area	2151	1487	869	619	435
#1	1	0.934601	0.71711	0.609886	0.478327												1	0.691306	0.403998	0.287773	0.202232
							2.14.19	iop10_1511	iop12_1514	iop15_1517	iop17_1520	iop20_1523
4.26.18	iop10_332	iop12_335	iop15_338	iop17_341	iop20_344		area	1736	1552	1438	986	934				6.22.18	iop10_650	iop12_653	iop15_656	iop17_659	iop20_662
area	777	678	520	256	135		#1od	1	0.894009	0.828341	0.567972	0.538018				area	1397	774	485	284	211
#2os	1	0.872587	0.669241	0.329472	0.173745												1	0.554044	0.347173	0.203293	0.151038
							2.14.19	iop10_1562	iop12_1565	iop15_1568	iop17_1571	iop20_1574
6.21.18	iop10_461	iop12_464	iop15_467	iop17_470	iop20_473		area	1579	1364	1205	1064	669				8.3.18	iop10_992	iop12_995	iop15_998	iop17_1001	iop20_1004
area	1591	1506	1322	1049	779		#2od	1	0.863838	0.763141	0.673844	0.423686				area	2388	2002	985	539	234
#2os	1	0.946574	0.830924	0.659334	0.489629												1	0.838358	0.412479	0.225712	0.0979899
																2.15.19	iop10_1778	iop12_1781	iop15_1784	iop17_1787	iop20_1790
																area	2174	1965	1685	1112	581
8.2.18	iop10_896	iop12_899	iop15_902	iop17_905	iop20_908											#2od	1	0.903864	0.775069	0.5115	0.267249
area	1898	1722	1588	1138	683
	1	0.907271	0.83667	0.599579	0.359852											2.15.19	iop10_1628	iop12_1631	iop15_1634	iop17_1637	iop20_1640
																area	1940	1596	917	432	128
8.2.18	iop10_800	iop12_803			iop20_812											#1od	1	0.82268	0.47268	0.22268	0.0659794
area	2059				1265
8.6.18	iop10_1367	iop12_1370	iop15_1373	iop17_1376	iop20_1379		Summary
area	1721	1591	1485	805	676
	1	0.924463	0.86287	0.467751	0.392795		PL
							IOP	4.20.18	4.25.18	6.21.18	8.2.18	2.14.19	2.14.19
6.21.18	iop10_569	iop12_572	iop15_575	iop17_578	iop20_581		10	100	100	100	100	100	100
area	2151	1487	869	619	435		12	91.538	93.4601	94.6574	90.7271	89.4009	86.3838
	1	0.691306	0.403998	0.287773	0.202232		15	81.7038	71.711	83.0924	83.667	82.8341	76.3141
							17	57.5758	60.9886	65.9334	59.9579	56.7972	67.3844
6.22.18	iop10_650	iop12_653	iop15_656	iop17_659	iop20_662		20	44.4254	47.8327	48.9629	35.9852	53.8018	42.3686
area	1397	774	485	284	211
	1	0.554044	0.347173	0.203293	0.151038		NT
							IOP	4.18.18	4.20.18	4.26.18	6.21.18	6.22.18	8.3.18	2.15.19	2.15.19
							10	100	100	100	100	100	100	100	100
8.3.18	iop10_992	iop12_995	iop15_998	iop17_1001	iop20_1004		12	55.1294	79.2256	87.2587	69.1306	55.4044	83.8358	90.3864	82.268
area	2388	2002	985	539	234		15	25.791	63.4296	66.9241	40.3998	34.7173	41.2479	77.5069	47.268
	1	0.838358	0.412479	0.225712	0.0979899		17	18.6961	32.3294	32.9472	28.7773	20.3293	22.5712	51.15	22.268
							20	9.6836	8.91211	17.3745	20.2232	15.1038	9.79899	26.7249	6.59794
8.3.18	iop10_1133	iop12_1136	iop15_1139	iop17_1142	iop20_1145
area	1792	1628	995	663	223
	1	0.908482	0.555246	0.369978	0.124442
2.14.19	iop10_1511	iop12_1514	iop15_1517	iop17_1520	iop20_1523
area	1736	1552	1438	986	934
#1od	1	0.894009	0.828341	0.567972	0.538018
2.14.19	iop10_1562	iop12_1565	iop15_1568	iop17_1571	iop20_1574
area	1579	1364	1205	1064	669
#2od	1	0.863838	0.763141	0.673844	0.423686
2.14.19	iop10_1484	iop12_1487	iop15_1490	iop17_1493	iop20_1496
area	1515	1395	1127	847	631
#1os	1	0.920792	0.743894	0.559076	0.416502
2.14.19	iop10_1583	iop12_1586	iop15_1589	iop17_1592	iop20_1595
area
#2os	1	#DIV/0!	#DIV/0!	#DIV/0!	#DIV/0!
2.15.19	iop10_1628	iop12_1631	iop15_1634	iop17_1637	iop20_1640
area	1940	1596	917	432	128
#1od	1	0.82268	0.47268	0.22268	0.0659794
2.15.19	iop10_1670	iop12_1673	iop15_1676	iop17_1679	iop20_1682
area	1617	1172	1065	734	614
#1os	1	0.724799	0.658627	0.453927	0.379716
2.15.19	iop10_1778	iop12_1781	iop15_1784	iop17_1787	iop20_1790
area	2174	1965	1685	1112	581
#2od	1	0.903864	0.775069	0.5115	0.267249
2.15.19	iop10_1670	iop12_1700	iop15_1676	iop17_1679	iop20_1682
area	1403	1216	1142
#2os	1	0.866714	0.81397	0	0
