# Supplementary material for: Anti-fibrotic activity of a rho-kinase inhibitor restores outflow function and intraocular pressure homeostasis
Source: eLife. 2021 Mar 30;10:e60831. doi: 10.7554/eLife.60831 (PMC8009676; doi:10.7554/eLife.60831)
Supplement: Figure 3—source data 2. [file elife-60831-fig3-data2.xlsx]

## Sheet: DEX-NP+NT
Mouse model: DEX-NP+NT
OCT
		SC area (um^2)							Normalized SC area (%)
mouse	Date of Scan	IOP 10	IOP 12	IOP 15	IOP 17	IOP 20			IOP 10	IOP 12	IOP 15	IOP 17	IOP 20
1	4.18.18	1125	575	269	195	101			100	51.1111	23.9111	17.3333	8.97778
2	4.20.18	1627	1289	1032	526	145			100	79.2256	63.4296	32.3294	8.91211
3	4.26.18	777	678	520	199	135			100	87.2587	66.9241	25.6113	17.3745
4	6.21.18	2191	1487	869	619	435			100	67.8686	39.6623	28.2519	19.8539
5	6.22.18	1364	774	502	284	211			100	56.7449	36.8035	20.8211	15.4692
6	8.3.18	2388	2002	1228	900	284			100	83.8358	51.4238	37.6884	11.8928
7	2.15.19	2174	1965	1685	1112	627			100	90.3864	77.5069	51.15	28.8408
8	2.15.19	1933	1596	917	432	128			100	82.566	47.4392	22.3487	6.62183
	mean	1697.38	1295.75	877.75	533.375	258.25		mean	100	74.8746	50.8876	29.4418	14.7429
	sd	572.478	566.54	453.477	332.818	185.095		sd	0	14.6133	17.677	10.9213	7.30594
	sem	202.401	200.302	160.328	117.669	65.441		sem	0	5.1666	6.24977	3.86126	2.58304
								95%CI	0	10.1263	12.2493	7.56793	5.06267
FEM
		SC area (um^2)							Normalized SC area (%)
	TM stiffness, E(kPa)	IOP 10	IOP 12	IOP 15	IOP 17	IOP 20			IOP 10	IOP 12	IOP 15	IOP 17	IOP 20		error
	21	1943.82	1499.25	838.746	646.083	509.93			100	77.13	43.1497	33.238	26.2333		14.5397
optimized stiffness	22	1943.82	1517.25	881.575	659.519	517.426			100	78.0552	45.3526	33.9295	26.6192		14.2105
	23	1943.82	1533.68	920.677	673.275	524.707			100	78.9004	47.3644	34.637	26.9936		14.3419

## Sheet: DEX-NP+PL
Mouse model: DEX-NP+PL
OCT
	SC area (um^2)								Normalized SC area (%)
subject	Date of Scan	IOP 10	IOP 12	IOP 15	IOP 17	IOP 20			IOP 10	IOP 12	IOP 15	IOP 17	IOP 20
1	4.20.18	1749	1601	1429	1007	777			100	91.538	81.7038	57.5758	44.4254
2	4.25.18	1315	1229	943	802	629			100	93.4601	71.711	60.9886	47.8327
3	6.21.18	1591	1506	1322	1049	779			100	94.6574	83.0924	65.9334	48.9629
4	8.2.18	1898	1722	1588	1138	683			100	90.7271	83.667	59.9579	35.9852
5	2.14.19	1736	1552	1438	986	934			100	89.4009	82.8341	56.7972	53.8018
6	2.14.19	1579	1364	1205	1064	669			100	86.3838	76.3141	67.3844	42.3686
	mean	1644.67	1495.67	1320.83	1007.67	745.167		mean	100	91.0279	79.8871	61.4395	45.5628
	sd	199.638	175.527	224.937	113.699	110.433		sd	0	2.95481	4.81999	4.34545	6.12897
	sem	81.502	71.6588	91.8301	46.4174	45.0839		sem	0	1.2063	1.96775	1.77402	2.50214
								95%CI	0	2.3643	3.85672	3.47702	4.90411
FEM
	SC area (um^2)								Normalized SC area (%)
	E(kPa)	IOP 10	IOP 12	IOP 15	IOP 17	IOP 20			IOP 10	IOP 12	IOP 15	IOP 17	IOP 20		Root mean square error from OCT
	59	1943.82	1729.52	1392.31	1228.13	905.975			100	88.9751	71.6282	63.1814	46.6086		8.74928
	60	1943.82	1732.35	1399.31	1237.31	918.959			100	89.1211	71.9886	63.6541	47.2767		8.59442
optimized stiffness	61	1943.82	1735.09	1406.12	1246.2	931.547			100	89.2624	72.3383	64.1118	47.9242		8.5334
	62	1943.82	1737.74	1412.68	1254.81	943.74			100	89.3991	72.6762	64.5553	48.5515		8.56098
	63	1943.82	1740.33	1419.08	1263.22	955.591			100	89.5318	73.0047	64.9863	49.1607		8.66777
