# Supplementary material for: Anti-fibrotic activity of a rho-kinase inhibitor restores outflow function and intraocular pressure homeostasis
Source: eLife. 2021 Mar 30;10:e60831. doi: 10.7554/eLife.60831 (PMC8009676; doi:10.7554/eLife.60831)
Supplement: Figure 3—source data 3. [file elife-60831-fig3-data3.xlsx]

## Sheet: summary
Eye number	Mouse	TM_E (kPa)	TM_Emax (kPa)	TM_Emin (kPa)	Treatment	Notes
115	NT7 OD	1.3	2.13	0.52	Control
116	NT7 OS	2.24	5.52	0.93	PL
117	NT5 OS	1.86	2.53	0.96	Control
118	NT9 OD	2.37	3.69	1	Control
119	NT10 OD	1.19	2.21	0.58	PL
120	NT10 OS	1.73	2.73	1.12	Control
121	NT9 OS	2.08	2.66	1.33	NT
122	NT8 OD	1.3	2.03	0.62	NT
123	NT8 OS	1.8	3.73	0.95	Control
140	NT5 OD	1.23	2.06	0.6	NT
141	NT6 OS	1.4	2.08	0.62	Control
142	NT4 OS	1.14	2.41	0.83	Control
143	NT3 OD	1.55	3.27	0.62	NT
144	NT4 OD	1.87	3.27	0.77	PL
145	NT6 OD	1.6	3.62	0.56	PL
146	NT2 OS	4.15	6.01	2.65	Control	anterior eye not fully covered by O.C.T.
147	NT1 OS	2.03	5.99	0.56	Control
148	NT1 OD	3.74	5.39	2.6	NT	weird orientation
149	NT2 OD	1.18	3.1	0.36	PL
150	NT3 OS	1.98	3.45	1.12	Control	refrozen to find the orientation of the eye
					PL = placebo
					NT = netarsudil
					TM_E = modulus of TM
					TM_Emax = maximum measured modulus of TM
					TM_Emin = minimum measured modulus of TM
					All modulus values on susequent sheets in kPa

## Sheet: Fig 3 Data
		Data used to construct Fig 3H
	Mouse Eye	PL_CON Stiffness (KPa)	Mouse Eye	PL Stiffness (KPa)		NT_CON Stiffness (KPa)	Mouse Eye	NT Stiffness (KPa)	Mouse Eye
	NT10 OS	1.73	NT10 OD	1.19		2.37	NT9 OD	2.08	NT9 OS
	NT7 OD	1.3	NT7 OS	2.24		1.8	NT8 OS	1.3	NT8 OD
	NT6 OS	1.4	NT6 OD	1.6		1.86	NT5 OS	1.23	NT5 OD
	NT4 OS	1.14	NT4 OD	1.87		1.98	NT3 OS	1.55	NT3 OD

## Sheet: 115
	Quadrant_1 (01/04/2018)	Measurement number						Quadrant_2 (01/04/2018)							Quadrant_3 (01/04/2018)
	Section 1 (up)	1	2	3	average			Section 1 (down)	1	2	3	average			Section 1 (side)	1	2	3	average
	X115_S11_2_1	1.64		2	1.82			X115_S11_1_1	0.92	0.86	0.86	0.88			X115_S11_7_1	0.66	0.72	0.8	0.726667
	X115_S11_2_2	1.52	1.45	1.42	1.46333			X115_S11_1_2	1.13	1.19	1.16	1.16			X115_S11_7_2	1.24	1.11	1.16	1.17
	X115_S11_2_3	1.08	1.06	1.05	1.06333			X115_S11_1_3	0.83	0.83	0.9	0.853333			X115_S11_7_3	1.92	1.88	1.94	1.91333
								X115_S11_1_4	1.41	1.47	1.56	1.48			X115_S11_7_4	1.76	1.51	1.61	1.62667
	mean				1.44889			X115_S11_1_5	2.31	2.11	2.08	2.16667
								X115_S11_1_6	4.12	3.81	4.07	4			mean				1.35917
								mean				1.75667
	X115_S11_3_1		0.82	0.86	0.84										X115_S11_8_1	0.66	0.6	0.57	0.61
	X115_S11_3_2			0.21	0.21										X115_S11_8_2	0.62	0.57	0.58	0.59
	X115_S11_3_3	0.68	0.67	0.69	0.68										X115_S11_8_3	1.66	1.59	1.71	1.65333
	X115_S11_3_4	0.35	0.35	0.35	0.35			X115_S11_4_1		0.25	0.27	0.26			X115_S11_8_4	2.42	2.75	2.5	2.55667
								X115_S11_4_2		0.64	0.68	0.66
	mean				0.52			X115_S11_4_3		1.79	1.85	1.82			mean				1.3525
								X115_S11_4_4	0.89	1	1.91	1.26667
	X115_S11_6_1	1.28	1.31	1.39	1.32667			mean				1.00167			X115_S11_9_1	1.14	1.14	1.13	1.13667
	X115_S11_6_3	2.38	3.1	3.32	2.93333										X115_S11_9_2	2.76	2.78	2.85	2.79667
															X115_S11_9_3		0.4	0.4	0.4
	mean				2.13										X115_S11_9_4	0.69	0.73	0.73	0.716667
								X115_S11_5_1	0.58	0.57	0.57	0.573333
								X115_S11_5_2		0.66	0.67	0.665			mean				1.2625
								X115_S11_5_3	0.55	0.55	0.6	0.566667
								X115_S11_5_4	0.6	0.63	0.67	0.633333
								X115_S11_5_5	1.95	1.89	1.7	1.84667
								mean				0.857
	mean	1.29871
	SD	0.477089

## Sheet: 116
	Quadrant_1 (01/04/2018)							Quadrant_2 (01/04/2018)							Quadrant_3 (01/10/2018)
	Section 1 (up)	1	2	3	average			Section 1 (down)	1	2	3	average			Section 1 (side)	1	2	3	average
	X116_S11_1_1	4.71	5.22	5.63	5.18667			X116_S11_2_1		0.71	0.81	0.76			X116_S11_1_1		0.71	0.77	0.74
	X116_S11_1_2	1.69	1.52	1.62	1.61			X116_S11_2_2	0.42	0.47	0.49	0.46			X116_S11_1_2	1.5	1.38	1.4	1.42667
	X116_S11_1_3	2.27	2.24	2.34	2.28333			X116_S11_2_3	1.42	1.8	1.73	1.65
	X116_S11_1_4	1.79	1.81	1.86	1.82			X116_S11_2_4	0.85	0.85	0.88	0.86			mean				1.08333
	X116_S11_1_5	1.49	1.45	1.46	1.46667
	X116_S11_1_6	2.72	2.7		2.71			mean				0.9325
	X116_S11_1_7	2.32	2.18		2.25
	X116_S11_1_8	5.41	5.56	6.04	5.67
	X116_S11_1_9	2.01	1.96	1.97	1.98			X116_S11_3_1	1.64	1.54	1.52	1.56667			X116_S11_2_1	1.1	1.07	1.03	1.06667
								X116_S11_3_2	8.37	8.58	8.27	8.40667			X116_S11_2_2	1.67	1.63	1.75	1.68333
	mean				2.77519			X116_S11_3_3	12.37	12.83	12.61	12.6033			X116_S11_2_3	1.24	1.29	1.28	1.27
								X116_S11_3_4	2.9	3.07	3.13	3.03333			X116_S11_2_4	1.97	1.84	1.76	1.85667
								X116_S11_3_5	6.47	6.79	6.83	6.69667
	X116_S11_4_1	1.21	1.21	1.21	1.21			X116_S11_3_6	0.82	0.83	0.81	0.82			mean				1.46917
	X116_S11_4_2	2.64	2.71	2.58	2.64333
	X116_S11_4_3	0.75	0.72	0.71	0.726667			mean				5.52111
	X116_S11_4_4	2.28	2.18	2.27	2.24333										X116_S11_3_1	3.35	3.51	3.36	3.40667
	X116_S11_4_5	1.75	0.69	1.8	1.41333										X116_S11_3_2	1.98	2.04	2.1	2.04
	X116_S11_4_6	5.13	5.37	5.4	5.3										X116_S11_3_3		2.27	2.44	2.355
	X116_S11_4_7	1.96	1.84	2.08	1.96			X116_S11_6_1							X116_S11_3_4	2.98	3.07	3.13	3.06
								X116_S11_6_2	0.42	0.43	0.35	0.4			X116_S11_3_5	4.13	4.26	4.49	4.29333
	mean				2.21381			X116_S11_6_3	1.37	1.49	1.85	1.57
								X116_S11_6_4	1.36	1.35	1.33	1.34667			mean				3.031
								X116_S11_6_5	2.27	2.61		2.44
	X116_S11_5_1	1.85	1.9	1.9	1.88333
	X116_S11_5_2	1.95	2.25	1.97	2.05667			mean				1.43917
	X116_S11_5_3	1.04	1.06	1.07	1.05667
	X116_S11_5_4
	X116_S11_5_5	0.96	0.96	0.97	0.963333
	X116_S11_5_6	1.75	2.07	2.18	2
	X116_S11_5_7	2.21	2.22	2	2.14333
								mean	2.2388
	mean				1.68389			SD	1.42613

## Sheet: 117
	Quadrant_1 (01/10/2018)							Quadrant_2 (01/10/2018)							Quadrant_3 (01/10/2018)
	Section 1 (up)	1	2	3	average			Section 1 (down)	1	2	3	average			Section 1 (side)	1	2	3	average
	X117_S11_3_1	1.13	1.23	1.3	1.22			X117_S11_1_1	1.17	1.5	1.56	1.41			X117_S12_1_1	2.64	2.51	1.99	2.38
	X117_S11_3_2		2.85	3.34	3.095			X117_S11_1_2	2.97	2.91	3.13	3.00333			X117_S12_1_2	4.62	4.12	2.91	3.88333
	X117_S11_3_3	2.21	1.91	2.08	2.06667			X117_S11_1_3	0.93	1.1	1.16	1.06333			X117_S12_1_3	0.93	0.89	0.9	0.906667
								X117_S11_1_4	0.75	0.75		0.75			X117_S12_1_4	0.91	0.89	0.89	0.896667
	mean				2.12722			X117_S11_1_5	1.46	1.41		1.435
															mean				2.01667
								mean				1.53233
	X117_S11_6_1	1.42	1.19	1.52	1.37667
	X117_S11_6_2	4.25	4.05	3.96	4.08667										X117_S12_2_1	2.3	2.19	2.31	2.26667
	X117_S11_6_3	4.33	3.93	4.22	4.16			X117_S11_4_1	1.45	1.52	1.5	1.49			X117_S12_2_2	1.44	1.94	1.97	1.78333
	X117_S11_6_4	1.67	1.67	1.67	1.67			X117_S11_4_2	0.39	0.46		0.425			X117_S12_2_3	1.36	1.34	1.34	1.34667
	X117_S11_6_5	2	1.93	1.97	1.96667			mean				0.9575			X117_S12_2_4	1.71	1.8	1.58	1.69667
	X117_S11_6_6	1.83	1.93	1.92	1.89333
															mean				1.77333
	mean				2.52556			X117_S11_5_1	4.2	4.47	4.55	4.40667
								X117_S11_5_2	2.66	2.5	2.79	2.65
								X117_S11_5_3	1.72	1.55	1.59	1.62			X117_S12_3_1		1.06	1.1	1.08
								X117_S11_5_4	2.28	2.09	2.14	2.17			X117_S12_3_2	0.92	0.92	0.83	0.89
															X117_S12_3_3	1.7	1.61	1.62	1.64333
								mean				2.71167
															mean				1.20444
	mean	1.85609
	SD	0.61217

## Sheet: 118
	Quadrant_1 (01/10/2018)							Quadrant_2 (01/10/2018)							Quadrant_3 (01/22/2018)
	Section 1 (up)	1	2	3	average			Section 1 (down)	1	2	3	average			Section 1 (side)	1	2	3	average
	X118_S11_1_1	1.92	1.81	1.9	1.87667			X118_S11_2_1	2.08	0.97	1.96	1.67			X118_S11_1_1	1.14	1.12	1.05	1.10333
	X118_S11_1_2	2.83	1.99	1.83	2.21667			X118_S11_2_2	2.77	2.64	2.54	2.65			X118_S11_1_2	2.01	1.99	1.94	1.98
	X118_S11_1_3	2.61	3.66	2.45	2.90667			X118_S11_2_3	2.02			2.02			X118_S11_1_3	1.28	1.13	1.13	1.18
	X118_S11_1_4	2.6	2.55	2.6	2.58333			X118_S11_2_4	2.75	2.59	2.49	2.61			X118_S11_1_4	0.84	0.86	0.86	0.853333
								X118_S11_2_5	2.64	2.07	2.22	2.31			X118_S11_1_5	1.26	1.12	1.11	1.16333
	mean				2.39583
								mean				2.252			mean				1.256
	X118_S11_4_1	1.83	1.95	1.94	1.90667			X118_S11_3_1	4.09	4.46	4.63	4.39333			X118_S11_2_1	1.35	1.25	1.31	1.30333
	X118_S11_4_2		1.65	1.87	1.76			X118_S11_3_2	2.75	3.04	3.03	2.94			X118_S11_2_2	1.86	1.76	1.96	1.86
	X118_S11_4_3	1.78	1.74	1.81	1.77667			X118_S11_3_3	4.59	3.62	4.62	4.27667			X118_S11_2_3	0.99	1.04	1.01	1.01333
	X118_S11_4_4		4.65	4.79	4.72			X118_S11_3_4	3.44	3.43	3.6	3.49
	X118_S11_4_5	4.69	4.26	4.17	4.37333			X118_S11_3_5	3.51	3.41	3.14	3.35333			mean				1.39222
	mean				2.90733			mean				3.69067
															X118_S11_3_1		0.84	0.93	0.885
															X118_S11_3_2	1.05	1.08		1.065
	X118_S11_5_1	2.56	2.41	2.25	2.40667			X118_S11_6_1	3.52	4.52	4.59	4.21			X118_S11_3_3	1.05	1.03	1.04	1.04
	X118_S11_5_2	2.44	2.22	2.21	2.29			X118_S11_6_2	4.28	4.59	4.51	4.46
	X118_S11_5_3	2.76	2.85	2.96	2.85667			X118_S11_6_3	2.7	2.34	2.48	2.50667			mean				0.996667
	X118_S11_5_4	4.87	4.66	3.32	4.28333			X118_S11_6_4		2.18	2.2	2.19
	X118_S11_5_5		1.7	1.58	1.64			X118_S11_6_5	5.37	4.96	4.55	4.96
	X118_S11_5_6	3.13	2.85	2.94	2.97333
								mean				3.66533
	mean				2.74167
	mean	2.36641
	SD	0.996649

## Sheet: 119
	Quadrant_1 (01/22/2018)							Quadrant_2 (01/22/2018)							Quadrant_3 (01/22/2018)
	Section 1 (up)	1	2	3	average			Section 1 (down)	1	2	3	average			Section 1 (side)	1	2	3	average
	X119_S11_2_1	0.41	0.4	0.39	0.4			X119_S11_1_1	2.98	2.68	2.74	2.8			X119_S12_1_1	0.71	0.73	0.75	0.73
	X119_S11_2_2	0.6	0.61	0.62	0.61			X119_S11_1_2							X119_S12_1_2	0.92	0.96	0.97	0.95
	X119_S11_2_3	1.08	0.93	0.98	0.996667			X119_S11_1_3	0.58	0.57	0.55	0.566667			X119_S12_1_3	0.42	0.46	0.47	0.45
	X119_S11_2_4	3.35	3.27	3.34	3.32			X119_S11_1_4	0.54	0.63		0.585			X119_S12_1_4	3.8	4.61	4.18	4.19667
	X119_S11_2_5							X119_S11_1_5	1.02	0.98		1
								X119_S11_1_6	1.18	1.27		1.225			mean				1.58167
	mean				1.33167
								mean				1.23533			X119_S12_2_1	1.22	1.14	1.11	1.15667
															X119_S12_2_2	0.57	0.56	0.55	0.56
															X119_S12_2_3	1.11	1.05	1	1.05333
	X119_S11_3_1	0.86	0.83	0.83	0.84			X119_S11_4_1
								X119_S11_4_2	2.36	2.34	2.27	2.32333			mean				0.923333
	mean				0.84			X119_S11_4_3	2.23	2.24	2.31	2.26
								X119_S11_4_4	1.22	1.28		1.25
								X119_S11_4_5	3	3.07	2.98	3.01667			X119_S12_3_1	1.26	1.39	1.36	1.33667
															X119_S12_3_2		1.16	1.29	1.225
								mean				2.2125			X119_S12_3_3	1.82	1.81	1.75	1.79333
															mean				1.45167
								X119_S11_5_1	0.45	0.36	0.38	0.396667
	X119_S11_6_1	0.33	0.32	0.33	0.326667			X119_S11_5_3	0.08	0.1	0.1	0.0933333
	X119_S11_6_2	0.98	0.95	0.92	0.95			X119_S11_5_5	1.21	1.26	1.28	1.25
	X119_S11_6_3	1.08	1.12	1.09	1.09667
								mean				0.58
	mean				0.791111
	mean	1.21636
	SD	0.501008

## Sheet: 120
	Quadrant_1 (01/22/2018)							Quadrant_2 (01/22/2018)							Quadrant_3 (01/22/2018)
	Section 1 (up)	1	2	3	average			Section 1 (down)	1	2	3	average			Section 1 (side)	1	2	3	average
	X120_S11_1_1	1.35	1.19	1.27	1.27			X120_S11_2_1	0.75	0.74	0.76	0.75			X120_S12_1_1	1.02	1	0.97	0.996667
	X120_S11_1_2	4.07	3.8	3.77	3.88			X120_S11_2_2	1.07	1.17	1.07	1.10333			X120_S12_1_2	0.81	0.79		0.8
	X120_S11_1_3	1.21	1.26	1.32	1.26333			X120_S11_2_3	0.65	0.61	0.6	0.62			X120_S12_1_3	0.37	0.36	0.38	0.37
	X120_S11_1_4	1.07	1.01	0.98	1.02			X120_S11_2_4	3.83	4.02	3.72	3.85667			X120_S12_1_4	1.49	1.45	1.57	1.50333
	X120_S11_1_5	1.92	2.08	2.13	2.04333			mean				1.5825			X120_S12_1_5	3.06	3.11	3.12	3.09667
	X120_S11_1_6	1.68	1.7	1.67	1.68333										X120_S12_1_6	3.06	2.23	2.52	2.60333
	X120_S11_1_7	4.89	4.81	4.3	4.66667										X120_S12_1_7	1.21	1.19	1.19	1.19667
															mean				1.50952
	mean				2.26095			X120_S11_3_1	0.67	0.64	0.65	0.653333							1.50952
								X120_S11_3_2	0.64	0.68	0.7	0.673333
								X120_S11_3_3	3.11	3.11	3.24	3.15333			X120_S12_2_1	0.91	0.84	0.85	0.866667
	X120_S11_4_1	0.95	0.91	0.92	0.926667			X120_S11_3_4	2.84	3.28	3.05	3.05667			X120_S12_2_2	1.75	1.7	2.02	1.82333
	X120_S11_4_3	1.25	1.41	1.7	1.45333			X120_S11_3_5	5.09	4.72	5.66	5.15667			X120_S12_2_3	0.52	0.53	0.52	0.523333
	X120_S11_4_4	0.77	0.79	0.82	0.793333			mean				2.53867			X120_S12_2_4	1.26	1.29	1.27	1.27333
	X120_S11_4_5	2.75	2.6	2.44	2.59667							2.53867			mean				1.12167
	X120_S11_4_6	0.53	0.55	0.52	0.533333
	mean				1.26067			X120_S11_6_1	0.71	0.7	0.69	0.7			X120_S12_3_1	1.59	1.52	1.48	1.53
								X120_S11_6_2	0.49	0.49	0.49	0.49			X120_S12_3_2	1.65	1.59	1.57	1.60333
								X120_S11_6_3	1.39	1.3	1.15	1.28			X120_S12_3_3	2	1.93	2.01	1.98
								X120_S11_6_4	1.07	1.08	0.92	1.02333			X120_S12_3_4	0.93	0.89	0.88	0.9
	X120_S11_5_1	2.13	2.3	2.15	2.19333			X120_S11_6_5	1.11	1.15	1.11	1.12333			mean				1.50333
	X120_S11_5_2	1.56	1.52	1.51	1.53			mean				0.923333
	X120_S11_5_3	1.75	1.68	1.58	1.67
	X120_S11_5_4	1.55	1.93	1.97	1.81667
	X120_S11_5_5	2.22	2.22	2.06	2.16667
	X120_S11_5_6	1.98	2.39	2.3	2.22333
	X120_S11_5_7	4.94	4.98	5.23	5.05
	mean				2.37857
	mean	1.67547
	SD	0.580143

## Sheet: 121
	Quadrant_1 (01/24/2018)							Quadrant_2 (01/24/2018)							Quadrant_3 (01/24/2018)
	Section 1 (up)	1	2	3	average			Section 1 (down)	1	2	3	average			Section 1 (side)	1	2	3	average
	X121_S11_2_1		2.25	2.37	2.31			X121_S11_1_1	0.84	0.8	0.77	0.803333			X121_S12_1_1
	X121_S11_2_2	1.77	1.87	1.87	1.83667			X121_S11_1_2	0.81	0.8	0.8	0.803333			X121_S12_1_2		0.58	0.55	0.565
	X121_S11_2_3	0.86	0.86	0.86	0.86			X121_S11_1_3	1.54	1.76	1.68	1.66			X121_S12_1_3	2.47	2.45	2.39	2.43667
	X121_S11_2_4	1.93	1.98	1.92	1.94333			X121_S11_1_4	0.54	0.53	0.53	0.533333			mean				1.50083
	mean				1.7375			X121_S11_1_5	1.37	1.43	1.46	1.42
								X121_S11_1_6	2.69	2.74	2.79	2.74
								mean				1.32667			X121_S12_2_1	1.28	1.25	1.23	1.25333
															X121_S12_2_2	5.41	5.62	5.67	5.56667
	X121_S11_3_1	2.44	2.67	2.7	2.60333										X121_S12_2_3	1.04	1.01	0.99	1.01333
	X121_S11_3_2	2.34	1.97	2.11	2.14										mean				2.61111
	X121_S11_3_3	1.7	1.71	1.5	1.63667			X121_S11_4_1	3.6	3.74	3.77	3.70333
	X121_S11_3_4	2.53	2.49	2.42	2.48			X121_S11_4_2	1.06	1.02	1.06	1.04667
	X121_S11_3_5	4.13	3.78	3.61	3.84			X121_S11_4_3		1.52	1.54	1.53
	X121_S11_3_6	3.18	3.23	3.35	3.25333			X121_S11_4_4	3.84		4.31	4.075
	mean				2.65889			mean				2.58875
	X121_S11_6_1	3.04	2.64	2.92	2.86667			X121_S11_5_1		2.86		2.86
	X121_S11_6_2	3.06	2.97	2.75	2.92667			X121_S11_5_2	0.54	0.46	0.49	0.496667
	X121_S11_6_3		2.29	2.28	2.285			X121_S11_5_3	0.63	0.55	0.58	0.586667
	X121_S11_6_4		2.97	2.34	2.655			X121_S11_5_4	1.85	1.93	1.86	1.88
	X121_S11_6_5	2.06	1.92		1.99			X121_S11_5_5	2.42	2.42	2.37	2.40333
								mean				1.64533
	mean				2.54467
	mean	2.07672
	SD	0.57334

## Sheet: 122
	Quadrant_1 (01/24/2018)							Quadrant_2 (01/24/2018)							Quadrant_3 (01/29/2018)
	Section 1 (up)	1	2	3	average			Section 1 (down)	1	2	3	average			Section 1 (side)	1	2	3	average
	X122_S11_1_1	0.71	0.8	0.84	0.783333			X122_S11_2_1	1.31	1.22	1.49	1.34			X122_S11_1_1	0.85	0.94	0.96	0.916667
	X122_S11_1_3	1.08	1.01	0.99	1.02667			X122_S11_2_2	0.9	0.71	0.69	0.766667			X122_S11_1_2		0.76	0.89	0.825
	X122_S11_1_4	0.77	0.87	0.78	0.806667			X122_S11_2_3	0.83	0.84	0.76	0.81			X122_S11_1_3	0.38	0.39	0.43	0.4
	X122_S11_1_5		0.58	0.57	0.575			X122_S11_2_4	2.47	2.47	2.42	2.45333			X122_S11_1_4	0.23	0.22	0.24	0.23
	mean				0.797917			X122_S11_2_5	0.78	0.77		0.775			X122_S11_1_5		0.73	0.75	0.74
								X122_S11_2_7	1.21	1.33	1.26	1.26667			X122_S11_1_6	0.56	0.61	0.61	0.593333
								mean				1.23528			X122_S11_1_7	0.59	0.57	0.53	0.563333
															X122_S11_1_8		0.68	0.75	0.715
	X122_S11_4_1	1.6	1.8	1.79	1.73										mean				0.622917
	X122_S11_4_2	2.15	2.09	1.98	2.07333
	X122_S11_4_4	2.59	1.97	1.97	2.17667			X122_S11_3_1
								X122_S11_3_2	0.85	0.76	0.8	0.803333
	mean				1.99333			X122_S11_3_3	0.27	0.26	0.27	0.266667
								X122_S11_3_5	1.09	0.99	1.07	1.05
								X122_S11_3_6	0.63	0.59	0.61	0.61
	X122_S11_5_1	1.47	1.59	1.67	1.57667			mean				0.6825
	X122_S11_5_2	2.33	2.21	2.1	2.21333										X122_S11_2_5	1.74	1.77	1.78	1.76333
	X122_S11_5_3	1.74	2	1.98	1.90667										X122_S11_2_7	1.38	1.35	1.35	1.36
	X122_S11_5_4	1.15	1.45	1.62	1.40667										X122_S11_2_9	2.52	2.52		2.52
	mean				1.77583			X122_S11_6_1	0.88	0.87	0.86	0.87			X122_S11_2_11	2.38	2.44	2.57	2.46333
								X122_S11_6_2	0.91	0.86	0.88	0.883333			mean				2.02667
								X122_S11_6_3	0.77	0.72	0.77	0.753333
								X122_S11_6_4	1.03	1.04	1.01	1.02667
								mean				0.883333
															X122_S11_3_2	0.71	0.68	0.63	0.673333
															X122_S11_3_4	0.83	0.91	0.85	0.863333
															mean				0.768333
	mean	#REF!
	SD	#REF!

[truncated: 8 more sheets: 123, 140, 141, 142, 143, 144, 145, 150]
