# Supplementary material for: Anti-fibrotic activity of a rho-kinase inhibitor restores outflow function and intraocular pressure homeostasis
Source: eLife. 2021 Mar 30;10:e60831. doi: 10.7554/eLife.60831 (PMC8009676; doi:10.7554/eLife.60831)
Supplement: Figure 4—source data 1. [file elife-60831-fig4-data1.xlsx]

## Sheet: FN
Group	Mouse	Value
Naïve	1	3.426
Naïve	1	5.655
Naïve	2	12.322
Naïve	3	3.701
Naïve	4	5.054
Naïve	5	10.425
Naïve	6	4.644
Naïve	6	4.163
Naïve	7	3.75
Naïve	7	6.386
DEX.NP+PL	8	6.957
DEX.NP+PL	8	12.561
DEX.NP+PL	9	5.672
DEX.NP+PL	9	10.079
DEX.NP+PL	10	13.255
DEX.NP+PL	10	5.727
DEX.NP+PL	11	4.258
DEX.NP+PL	11	3.568
DEX.NP+PL	12	7.186
DEX.NP+PL	12	5.726
DEX.NP+NT	13	5.287
DEX.NP+NT	13	8.551
DEX.NP+NT	14	3.353
DEX.NP+NT	14	3.761
DEX.NP+NT	15	3.311
DEX.NP+NT	15	3.301
DEX.NP+NT	16	4.284
DEX.NP+NT	16	4.353
DEX.NP+NT	17	3.568
DEX.NP+NT	17	4.939
