# Supplementary material for: Anti-fibrotic activity of a rho-kinase inhibitor restores outflow function and intraocular pressure homeostasis
Source: eLife. 2021 Mar 30;10:e60831. doi: 10.7554/eLife.60831 (PMC8009676; doi:10.7554/eLife.60831)
Supplement: Figure 4—source data 2. [file elife-60831-fig4-data2.xlsx]

## Sheet: aSMA
Group	Mouse	Value
Naïve	1	12.112
Naïve	1	5.144
Naïve	2	11.502
Naïve	3	15.138
Naïve	4	7.355
Naïve	5	7.818
Naïve	6	3.304
Naïve	6	3.564
Naïve	7	3.251
Naïve	7	2.64
DEX.NP+PL	8	13.717
DEX.NP+PL	8	11.792
DEX.NP+PL	9	12.953
DEX.NP+PL	9	16.718
DEX.NP+PL	10	21.143
DEX.NP+PL	10	11.135
DEX.NP+PL	11	11.045
DEX.NP+PL	11	3.548
DEX.NP+PL	12	8.117
DEX.NP+PL	12	6.436
DEX.NP+NT	13	13.979
DEX.NP+NT	13	9.595
DEX.NP+NT	14	6.28
DEX.NP+NT	14	4.294
DEX.NP+NT	15	4.124
DEX.NP+NT	15	6.007
DEX.NP+NT	16	4.811
DEX.NP+NT	16	4.896
DEX.NP+NT	17	3.195
DEX.NP+NT	17	6.359
