# Supplementary material for: Anti-fibrotic activity of a rho-kinase inhibitor restores outflow function and intraocular pressure homeostasis
Source: eLife. 2021 Mar 30;10:e60831. doi: 10.7554/eLife.60831 (PMC8009676; doi:10.7554/eLife.60831)
Supplement: Figure 5—source data 1. [file elife-60831-fig5-data1.xlsx]

## Sheet: raw data
basement membrane deposits scoring on EM pictures
	score	score
	Dan	Ross		treatment	mouse #		average of two scores	average score/mouse	mouse#	total mouse #
nt1	0	0		C57 naïve	1	naïve	0	0.25	naïve #1	5
nt2	0	1		C57 naïve	1		0.5
nt3	0	0		C57 naïve	1		0
nt4	1	0		C57 naïve	1		0.5
nt5	2	0		C57 naïve	2		1	1	naïve #2
nt6	0	0		C57 naïve	3		0	0	naïve #3
nt7	1	0		C57 naïve	4		0.5	0.5	naïve #4
nt8	0	1		C57 naïve	5		0.5	0.5	naïve #5					Naïve	Ghost-NP	DEX-NP	DEX-NP+PL	DEX-NP+NT
nt9	2	2		dex.np	6	dex.np	2	2	dex.np#1	5				0.25	0.25	2	1.75	0.833333
nt10	2	2		dex.np	6		2							1	0.5	2	1.75	1
nt11	2	2		dex.np	7		2	2	dex.np#2					0	0.5	1.66667	1.5	0.5
nt12	2	2		dex.np	7		2							0.5	0.75	2	1.25	0.5
nt13	1	1		dex.np	8		1	1.66667	dex.np#3					0.5	0	2	1	1.875
nt14	2			dex.np	8		2										1.5	0.5
nt15	2			dex.np	8		2										1.25	0.75
nt16	2	2		dex.NT	9	dex_NT	2	0.833333	dex_NT#1	8								0.75
nt17	0	1		dex.NT	9		0.5
nt18	0	0		dex.NT	9		0
nt19	1	1		dex.NT	10		1	1	dex_NT#2
nt20	1	0		dex.NT	11		0.5	0.5	dex_NT#3
nt21	1	1		dex.NT	12		1	0.5	dex_NT#4
nt22	1	0		dex.NT	12		0.5
nt23	0	0		dex.NT	12		0
nt24	2	2		dex.NT	13		2	1.875	dex_NT#5
nt25	2	2		dex.NT	13		2
nt26	2	1		dex.NT	13		1.5
nt27	2	2		dex.NT	13		2
nt28	1	2		dex.PL	14	dex_PL	1.5	1.75	dex_PL#1	7
nt29	2	2		dex.PL	14		2
nt30	1	2		dex.PL	15		1.5	1.75	dex_PL#2
nt31	2	2		dex.PL	15		2
nt32	1	2		dex.PL	16		1.5	1.5	dex_PL#3
nt33	1	2		dex.PL	16		1.5
nt34	1	1		dex.PL	17		1	1.25	dex_PL#4
nt35	1	2		dex.PL	17		1.5
nt36	0	0		ghost.np	18	ghost	0	0.25	ghost#1	5
nt37	1	0		ghost.np	18		0.5
nt38	0	0		ghost.np	19		0	0.5	ghost#2
nt39	1	1		ghost.np	19		1
nt40	1	0		ghost.np	20		0.5	0.5	ghost#3
nt41	2	2		dex.np	21		2	2	dex.np#4
nt42	2	2		dex.np	22		2
nt43	2	2		dex.np	23		2	2	dex.np#5
nt44	2	2		dex.np	23		2
nt45	2	2		dex.np	23		2
nt46	1	0		dex_NT	24		0.5	0.5	dex_NT#6
nt47	0	0		dex_NT	25		0	0.5	dex_NT#7
nt48	1	0		dex_NT	26		0.5
nt49	1	1		dex_NT	26		1
nt50	1	1		dex_NT	27		1	0.75	dex_NT#8
nt51	1	0		dex_NT	27		0.5
nt52	1	1		dex_PL	28		1	1	dex_PL#5
nt53	2	2		dex_PL	29		2	1.5	dex_PL#6
nt54	1	1		dex_PL	29		1
nt55	1	1		dex_PL	30		1	1.25	dex_PL#7
nt56	2	1		dex_PL	30		1.5
nt57	1	0		ghost	31		0.5	0.75	ghost#4
nt58	1	1		ghost	31		1
nt59	0	0		ghost	32		0	0	ghost#5
nt60	0	0		ghost	32		0
nt61	0	0		ghost	32		0

## Sheet: summary data
Naïve	Ghost-NP	DEX-NP	DEX-NP+PL	DEX-NP+NT		Group	Mouse	Value
0.25	0.25	2	1.75	0.833333		Naïve	1	0.25
1	0.5	2	1.75	1		Naïve	2	1
0	0.5	1.66667	1.5	0.5		Naïve	3	0
0.5	0.75	2	1.25	0.5		Naïve	4	0.5
0.5	0	2	1	1.875		Naïve	5	0.5
			1.5	0.5		Ghost	1	0.25
			1.25	0.75		Ghost	2	0.5
				0.75		Ghost	3	0.5
						Ghost	4	0.75
						Ghost	5	0
						DEX.NP	1	2
						DEX.NP	2	2
						DEX.NP	3	1.66667
						DEX.NP	4	2
						DEX.NP	5	2
						DEX.NP+PL	1	1.75
						DEX.NP+PL	2	1.75
						DEX.NP+PL	3	1.5
						DEX.NP+PL	4	1.25
						DEX.NP+PL	5	1
						DEX.NP+PL	6	1.5
						DEX.NP+PL	7	1.25
						DEX.NP+NT	1	0.833333
						DEX.NP+NT	2	1
						DEX.NP+NT	3	0.5
						DEX.NP+NT	4	0.5
						DEX.NP+NT	5	1.875
						DEX.NP+NT	6	0.5
						DEX.NP+NT	7	0.75
						DEX.NP+NT	8	0.75
