# Supplementary material for: Anti-fibrotic activity of a rho-kinase inhibitor restores outflow function and intraocular pressure homeostasis
Source: eLife. 2021 Mar 30;10:e60831. doi: 10.7554/eLife.60831 (PMC8009676; doi:10.7554/eLife.60831)
Supplement: Figure 5—source data 2. [file elife-60831-fig5-data2.xlsx]

## Sheet: Sheet1
Group	Mouse	Value
Naïve	1	0.240402
Naïve	1	0.430897
Naïve	1	0.421703
Naïve	1	0.589236
Naïve	2	0.666407
Naïve	3	0.124518
Naïve	4	0.452847
Naïve	5	0.271414
Ghost_NP	6	0.683049
Ghost_NP	6	0.53354
Ghost_NP	7	0.451929
Ghost_NP	7	0.329215
Ghost_NP	8	0.675488
Ghost_NP	9	0.659771
Ghost_NP	9	0.535771
Ghost_NP	10	0.294111
Ghost_NP	10	0.447972
Ghost_NP	10	0.320143
DEX_NP	11	0.733071
DEX_NP	11	0.948587
DEX_NP	12	0.836367
DEX_NP	12	0.942913
DEX_NP	13	0.656611
DEX_NP	13	0.935836
DEX_NP	13	0.988039
DEX_NP	14	0.926465
DEX_NP	14	0.556722
DEX_NP	15	0.893131
DEX_NP	15	0.803234
DEX_NP	15	0.849361
DEX_NP_PL	16	0.584863
DEX_NP_PL	16	0.716506
DEX_NP_PL	17	0.726108
DEX_NP_PL	17	0.579994
DEX_NP_PL	18	0.411789
DEX_NP_PL	18	0.534748
DEX_NP_PL	19	0.805334
DEX_NP_PL	19	0.769116
DEX_NP_PL	20	0.760672
DEX_NP_PL	21	0.716501
DEX_NP_PL	21	0.620384
DEX_NP_PL	22	0.762155
DEX_NP_PL	22	0.628574
DEX_NP_PL	23	0.830262
DEX_NP_PL	24	0.493126
DEX_NP_PL	24	0.53057
DEX_NP_PL	24	0.446183
DEX_NP_PL	25	0.687352
DEX_NP_PL	25	0.899123
DEX_NP_PL	26	0.640753
DEX_NP_PL	26	0.690305
DEX_NP_PL	27	0.368531
DEX_NP_PL	27	0.312864
DEX_NP_PL	28	0.425163
DEX_NP_PL	28	0.582289
DEX_NP_PL	29	0.998883
DEX_NP_PL	29	0.980957
DEX_NP_PL	30	0.699097
DEX_NP_PL	31	0.639825
DEX_NP_PL	31	0.942349
DEX_NP_PL	32	0.608165
DEX_NP_PL	32	0.758691
DEX_NP_PL	33	0.918496
DEX_NP_PL	33	0.737122
DEX_NP_NT	34	0.532423
DEX_NP_NT	34	0.462289
DEX_NP_NT	34	0.391407
DEX_NP_NT	35	0.565171
DEX_NP_NT	36	0.356396
DEX_NP_NT	37	0.708638
DEX_NP_NT	37	0.543197
DEX_NP_NT	37	0.493448
DEX_NP_NT	38	0.982467
DEX_NP_NT	38	0.74697
DEX_NP_NT	38	0.580063
DEX_NP_NT	38	0.808009
DEX_NP_NT	39	0.545032
DEX_NP_NT	40	0.622719
DEX_NP_NT	40	0.467337
DEX_NP_NT	40	0.457136
DEX_NP_NT	41	0.562456
DEX_NP_NT	41	0.626203
DEX_NP_NT	42	0.476815
DEX_NP_NT	42	0.471245
DEX_NP_NT	43	0.650274
DEX_NP_NT	44	0.432791
DEX_NP_NT	45	0.501751
DEX_NP_NT	45	0.455768
DEX_NP_NT	46	0.411786
DEX_NP_NT	46	0.487671
DEX_NP_NT	47	0.200102
DEX_NP_NT	47	0.159071
DEX_NP_NT	48	0.662564
DEX_NP_NT	49	0.579305
DEX_NP_NT	49	0.436356
DEX_NP_NT	50	0.108717
DEX_NP_NT	50	0.416429
